# Supplementary material for: A dual role for the βPS integrin myospheroid in mediating Drosophila embryonic macrophage migration
Source: PubMed Central journal article supplement — J Cell Sci. 2013 Aug 1;126(15):3475–84. doi: 10.1242/jcs.129700 (PMC3730248; doi:10.1242/jcs.129700), 2013-08-01
Supplement: supp_jcs.129700_JCS129700.pdf [file supp_jcs.129700_JCS129700.pdf]

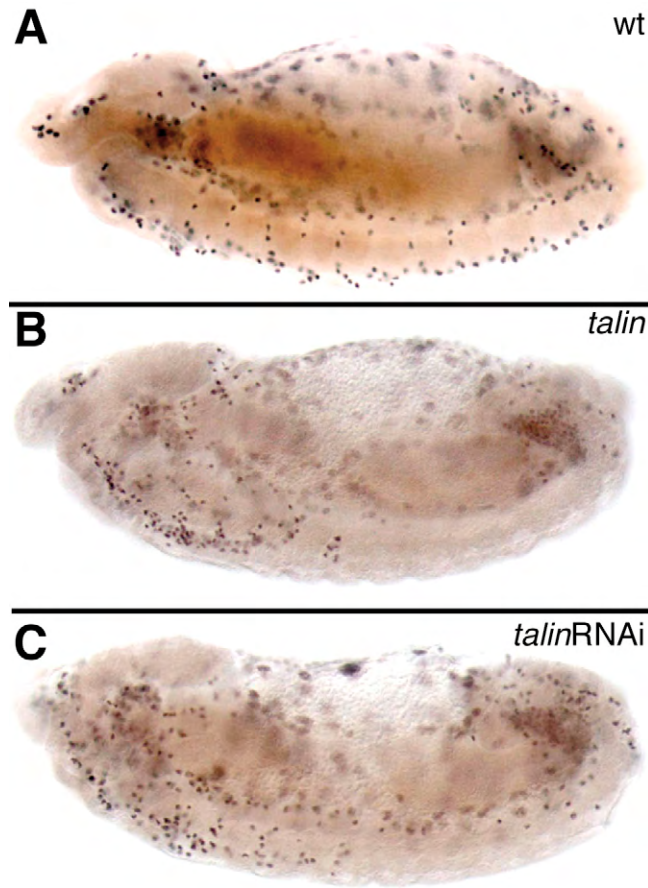

**Fig. S1. Talin is required for proper haemocyte migration.** (A-C) Lateral view of stage 13 embryos stained with an anti-Srp antibody to label the haemocytes. (A) Wild-type embryo. (B,C) Elimination of both maternal and zygotic Talin (B) or expression of UAS-*talin* RNAi in haemocytes (C) phenocopy the haemocyte migration defects observed in *mys* mutant embryos.

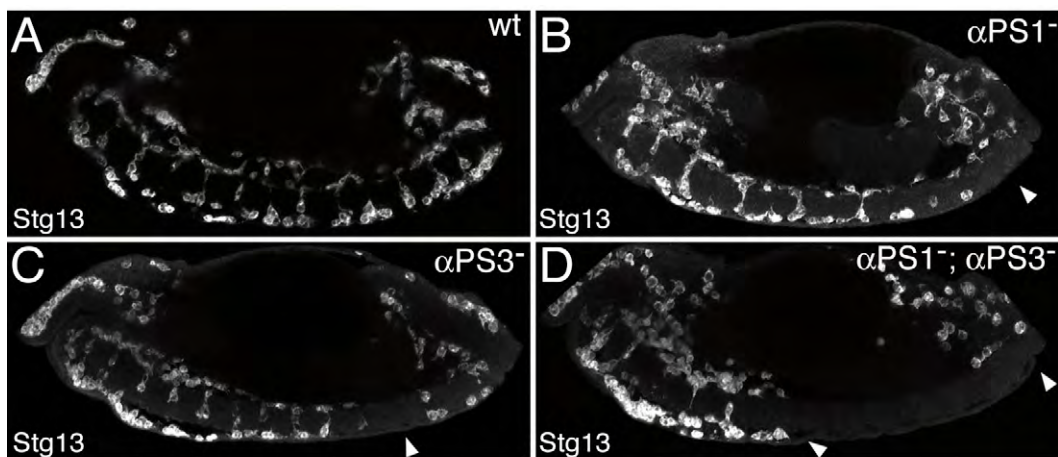

**Fig. S2. PS1 and PS3 integrins act redundantly to regulate haemocyte migration.** (A-D) Lateral view of stage 13 embryos carrying the combination UAS-CD2/*srph-GAL4* and stained with an anti-CD2 antibody. (A) Wild-type embryo. (B,C) Elimination of either αPS1 (B) or αPS3 (C) causes a small delay in haemocyte migration. (D) However, elimination of both phenocopies loss of bPS function.

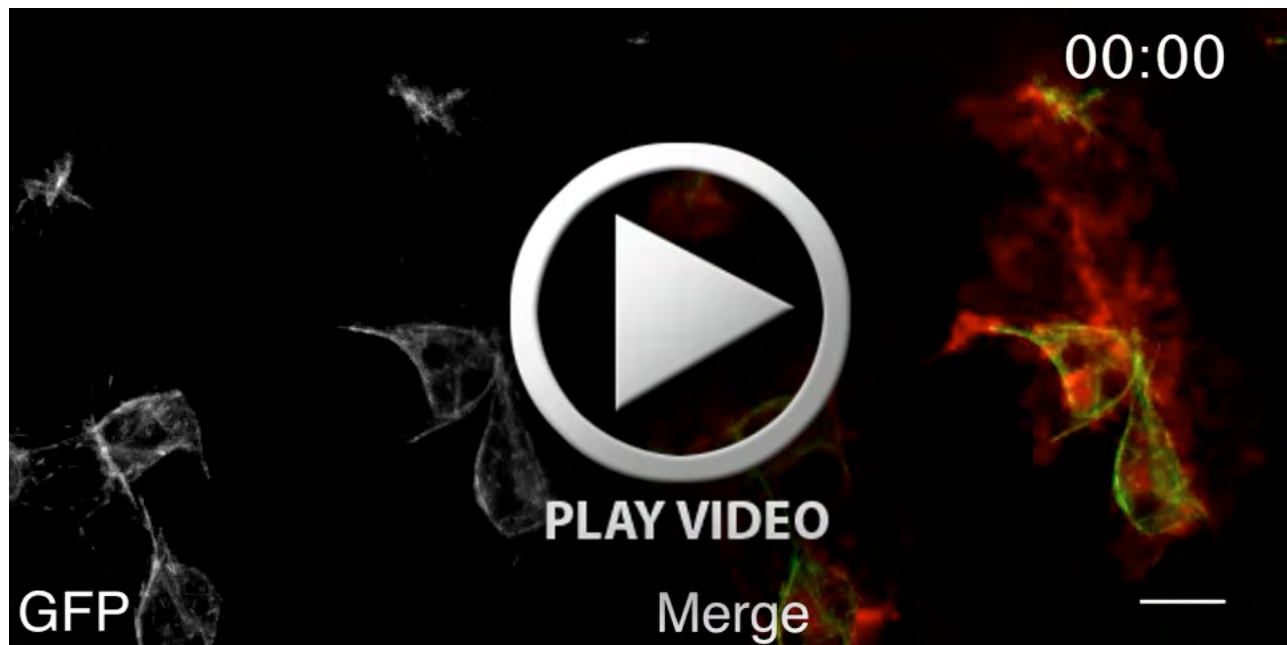

**Movie 1. Actin and microtubule dynamics in WT haemocytes.** Live imaging of WT haemocytes expressing Clip170-GFP, to label microtubules (MTs), and mCherry-Moesin, to label F-actin, migrating randomly in stage 15 embryos. In WT haemocytes, microtubules bundle into an arm and there is a close co-ordination of MT arm disassembly and lamellipodial retraction. Confocal stills were acquired at 30 second time intervals and the movie displayed at 7 frames/second for 30 minutes. Scale bar: 10 mm.

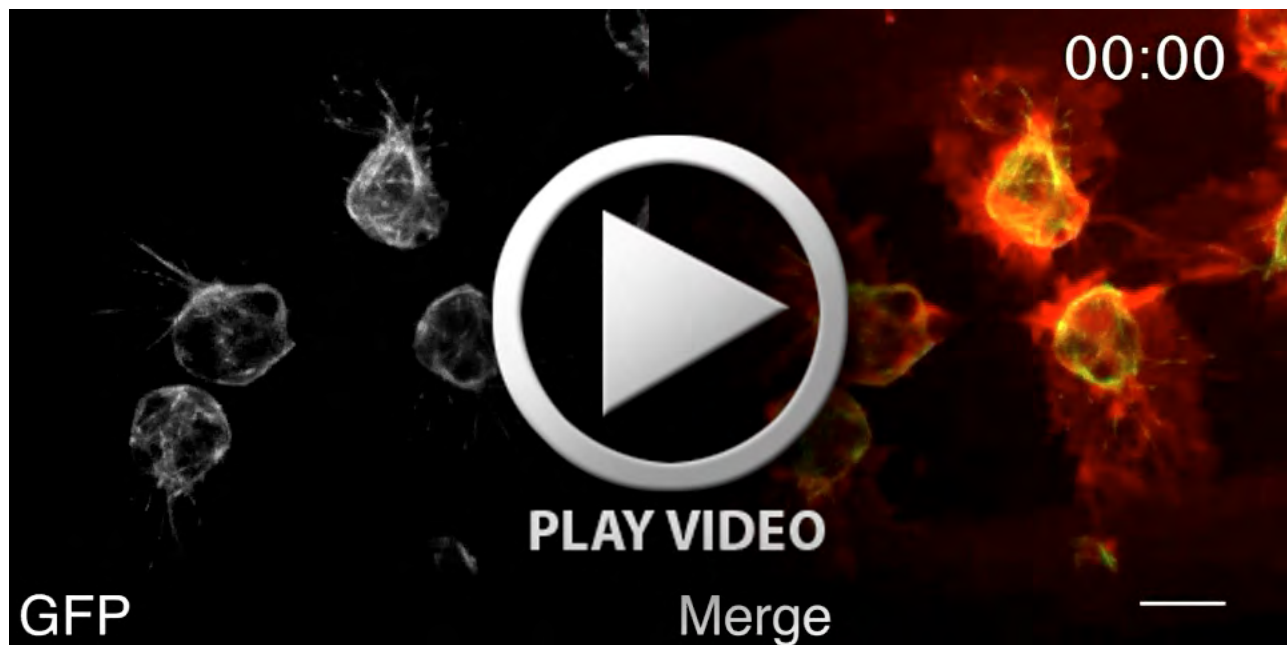

**Movie 2. Disrupted migration and microtubule dynamics in stage 15 *mys* mutant haemocytes.** *mys* mutant haemocytes expressing Clip170-GFP and mCherry-Moesin. In *mys* mutant haemocytes, microtubules polarised and initially formed an arm, but this structure was not maintained and rapidly collapsed within persisting lamellipodia. In addition, *mys* mutant haemocytes exhibit little migration and remain in close contact throughout imaging. Confocal stills were acquired at 30 second time intervals and the movie displayed at 7 frames/second for 30 minutes. Scale bar: 10 mm.
